Manuscript for

# Attentional Modulation of the Auditory Steady-State Response across the Cortex

Cassia Low Manting<sup>1,2\*</sup>, Lau M. Andersen<sup>1,3</sup>, Balazs Gulyas<sup>2,4</sup>, Fredrik Ullén<sup>5</sup> and Daniel Lundqvist<sup>1</sup>

<sup>1</sup> NatMEG, Department of Clinical Neuroscience, Karolinska Institutet, Stockholm, Sweden

<sup>2</sup> Cognitive Neuroimaging Centre (CoNiC), Lee Kong Chien School of Medicine, Nanyang Technological University, Singapore

<sup>3</sup> Center of Functionally Integrative Neuroscience, Aarhus University, Aarhus, Denmark

<sup>4</sup> Department of Clinical Neuroscience, Karolinska Institutet, Stockholm, Sweden

<sup>5</sup> Department of Neuroscience, Karolinska Institutet, Stockholm, Sweden

\*corresponding author

E-mail: [mtlow1@e.ntu.edu.sg](mailto:mtlow1@e.ntu.edu.sg), [cassia@natmeg.se](mailto:cassia@natmeg.se)

## Keywords

ASSR, frequency-tagging, selective auditory attention, amplitude-modulation, diotic, music

## Abstract

Selective auditory attention allows us to focus on relevant sounds within noisy or complex auditory environments, and is essential for the processing of speech and music. The *auditory steady-state response (ASSR)* has been proposed as a neural measure for tracking selective auditory attention, even within continuous and complex soundscapes. However, the current literature is inconsistent on how the ASSR is influenced by selective attention, with findings based primarily on attention being directed to either ear rather than to sound content. In this experiment, a mixture of melody streams was presented to both ears identically (*diotically*) as we examined if selective auditory attention to sound content influences the ASSR. Using magnetoencephalography (MEG), we assessed the stream-specific ASSRs from three frequency-tagged melody streams when attention was directed between each melody stream, based on their respective pitch and timing. Our results showed that selective attention enhances the ASSR power of an attended melody stream by 15 % at a general sensor level. Furthermore, we explored the distribution of cortical ASSR sources and their respective attentional modulation. A novel finding using distributed source modelling revealed that the ASSR is modulated by attention in many areas across the cortex, with frontal regions experiencing the strongest enhancement of up to ~ 80 %. ASSRs in the temporal and parietal cortices were enhanced by approximately 20 - 25 %. We also found a systematic right hemispheric bias of the ASSR attentional modulation. Overall, this study demonstrates that selective auditory attention to sound content increases the ASSR power of the attended stream according to a specific neural pattern involving the frontal, parietal and temporal cortices. This ability to readily capture attentional changes in a stimuli-precise manner makes the ASSR a useful tool for studying selective auditory attention, especially in complex auditory environments.

## 1. Introduction

In light of the brain's limited capacity to process simultaneous information, the ability to attend to one out of several competing sounds is therefore essential, allowing one to extract and process the most important information amidst a complex auditory environment. This phenomenon was first coined the "Cocktail party effect (CPE)" by Cherry in 1953 and is important to functions such as speech recognition, musicianship and threat identification<sup>1</sup>. In music, selective auditory attention can manifest as the ability to discern a single instrument amongst an orchestral performance, or a single voice in a choir. This ability, measured both in terms of speech-in-noise performance<sup>2,3</sup> and robustness of neural patterns<sup>3</sup>, is positively correlated with the listener's amount of musical training<sup>2,3</sup>, suggesting that selective attention capabilities may be improved through strategic training regimes. While the relevance of the CPE for perception and performance is well documented, the neural mechanisms underlying this phenomenon is still not completely understood. This is partially due to the difficulties in isolating the specific brain activity that stem from one out of many simultaneous auditory sources: If you selectively attend to only the soprano voice while listening to a choir performance, how do you separate brain activity representing the soprano from that representing the rest of the choir and study how that activity is influenced by selective attention? Previous magnetoencephalography (MEG) and electroencephalography (EEG) studies on selective auditory attention have shown that time-locked neuronal activity [e.g. event-related fields (ERFs) and potentials (ERPs)] from a wide range of auditory stimuli (e.g. click, tones, speech) is increased by attention<sup>4-7</sup>. However, such time-locked approaches are not easily compatible with the complex and dynamic characteristics of naturalistic or continuous stimuli. Importantly, it is very difficult to distinguish between auditory sources with simultaneous onset times from their event-related activities, which is often the case in a natural auditory environment. In such scenarios, another approach using the Auditory Steady-State Response (ASSR) may be useful to isolate and assess the neural activity related to each individual sound.

The ASSR can be described as an *oscillatory* evoked potential that continuously phase-locks to the intrinsic fundamental frequency of the stimulus over the time period of stimulus presentation<sup>8,9</sup>. The constituent discrete frequency components of the ASSR can be retrieved from recorded MEG/EEG data using power spectral density (PSD) estimation methods such as Fourier analysis. A handy way to adjust the stimulus frequency, and consequently the ASSR frequency, while retaining much of the stimulus property (e.g. pitch, timbre) is via *amplitude modulation (AM) frequency-tagging* of the sound. This is done by increasing and decreasing the amplitude of the sound envelope (i.e. volume) at a precise rate defined by the modulation frequency ( $f_m$ ). This technique can be used to disentangle the processing of sound streams presented simultaneously, since the neural activity to each stream can be distinguished by a unique  $f_m$  during analysis<sup>10-11</sup>. In humans, the ASSR is known to reach a maximum power response at frequencies close to 40 Hz<sup>8</sup>, hence the term *40 Hz ASSR*. Several intermodal studies have demonstrated that the cortically generated ASSR is enhanced when attention is voluntarily directed towards (as compared to directed away from) an auditory stimuli from a competing visual stimulus<sup>12-14</sup>. Within the auditory domain (i.e. intramodal studies) however, results remain unclear. In some cases, selective attention tasks using dichotic stimulus presentation reported an ASSR enhancement by attention while in other cases no effect of attention was found<sup>6, 15-17</sup>. The inconsistency in findings suggests that whether or not attention is found to affect the ASSR depends on several experimental design factors pertaining to the stimuli, task and analytical approach. Furthermore, the majority of intramodal auditory attention ASSR studies adopt a *dichotic* experimental design wherein participants shift attention between the left and right ears, and the corresponding changes in cortical ASSRs are assessed with MEG<sup>15,18</sup>. Therefore, selective attention in such dichotic experiments is heavily reliant on spatial separation of the auditory input (ears) rather than perceptual separation of the sound streams based on sound content, despite the latter being an essential aspect of selective listening. Also, the spatial separation approach is inherently limited to two ears and thus only two sources, making it inapplicable to studies involving complex auditory mixtures with several sources. To the best of our knowledge, no study has examined the influence of selective attention on the 40 Hz ASSR when the same auditory mixture of multiple streams is presented to both ears (i.e. diotically), and auditory stream separation must be based solely on perceptual features of the sound content (i.e. pitch/timbre/tempo). This gap in the ASSR-attention literature may point to some challenges that researchers face in designing such an experiment, for example, in finding suitable stimuli and tasks with sufficient stream separability to evoke a detectable difference in selective attention when using diotic stimuli.

In the current study, we aim to explore this uncharted approach by using a task where selective attention is directed towards diotically-presented AM frequency-tagged melody streams that are easily differentiable by their respective timing and pitch. For the frequency-tagging, we used separate modulation frequencies at  $f_m = 37, 39, 41$  Hz to individually tag each of three different melody streams, with the goal of eliciting ASSRs corresponding to the three melody streams that can be clearly separated in the frequency domain during analysis.

The primary aim of this study was to assess if ASSR power is influenced when selective attention is directed towards a specific melody stream. To assess the ASSR, we measured ongoing brain activity at millisecond temporal resolution and millimetre spatial precision using MEG<sup>19</sup>. At the same time, MEG is also well-suited for spatially precise modelling of brain activity at an individual anatomical level. Based on the rich literature supporting the enhancement effect of selective attention on neural signals<sup>7, 20-23</sup>, we hypothesized that attention increases the ASSR power corresponding to the attended stream. With sufficient signal power, we expect that this attention effect may be observed already in sensor-level data.

A secondary aim of this study is to understand the structural distribution of the cortical sources that are involved in ASSR expression and their attentional modulation. Since little is known about the source distribution of the 40 Hz ASSR, apart from its presence in the auditory cortex<sup>24-26</sup>, we cannot precisely point to, *a priori*, where to expect the ASSR attention effect although attention-related literature does suggest the prefrontal cortex as a likely site<sup>27-30</sup>. As such, we will carry out source analysis

61 using a distributed source model to identify likely ASSR source positions, and then examine the degree to which attention  
62 modulates ASSR power in each of these ASSR source regions. In this sense, our secondary aim is more exploratory in nature  
63 and we have adopted a more data-driven approach for this part of the analysis.

## 64 2. Materials and Methods

### 65 2.1 Participants

66 A total of 29 participants (age 18 – 49 years, mean age = 28.0, SD = 4.9; 10 female; 2 left-handed) with normal hearing  
67 volunteered to take part in the experiment. The experiment was approved by the Regional Ethics Review Board in Stockholm  
68 (Dnr: 2017/998-31/2). Both written and oral informed consent were obtained from all participants prior to the experiment. All  
69 participants received a monetary compensation of SEK 600 (~ EUR 60). One participant was excluded due to incomplete data  
70 collection, resulting in a final sample size of 28 participants.

### 71 2.2 Experimental Task: Melody Development Tracking (MDT) task

72 Participants were presented with 3 melody streams of increasing pitch [i.e. carrier frequency ( $f_c$ ) range], henceforth referred  
73 to as the Bottom voice, Middle voice, and Top voice. The participants were instructed to direct attention exclusively to the  
74 Bottom voice or Top voice according to a cue before the melodies started (e.g. “Attend bottom voice!”). At a random surprise  
75 point during melody playback, the melody stopped and participants were asked to report the latest direction of pitch change for  
76 the attended melody stream by pressing one out of three buttons, representing *falling*, *rising* or *constant* pitch respectively (e.g.  
77 whether the last note was falling, rising or constant relative to the note preceding it. Refer to Fig. 1). In total, 28 of these  
78 responses were collected for each participant.

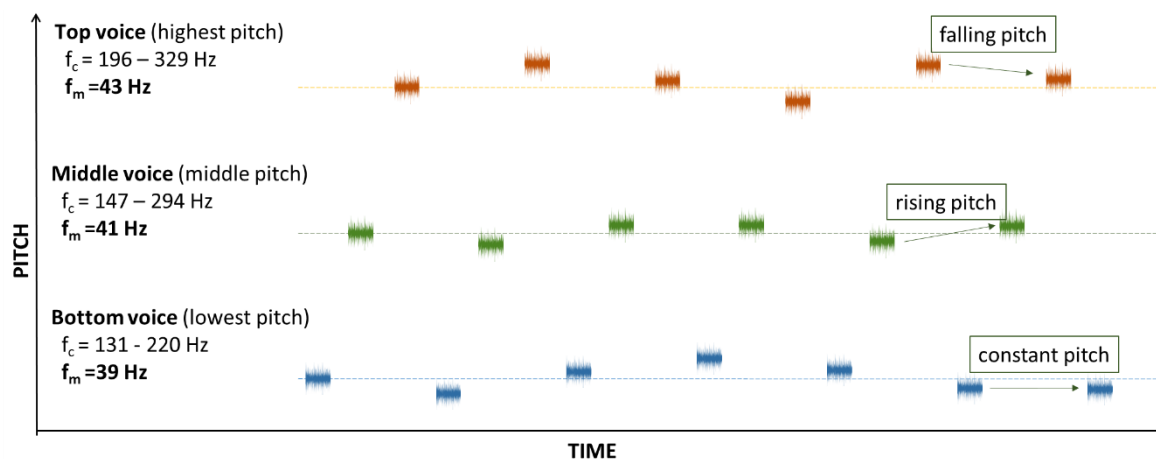

79  
80 **Figure 1.** The Melody Development Tracking (MDT) task. Participants listened to three melody streams while attending to either the Bottom  
81 voice or Top voice following a cue. When the melody stopped, participants were asked to report the last direction of pitch change for the  
82 attended melody stream (i.e. falling, rising or constant pitch as illustrated). The three melody streams were presented separately in time,  
83 starting from Bottom to Top (shown in figure) or its reverse. The respective  $f_c$  (pitch) range and  $f_m$  of each stream are indicated above.

84  
85 The three voices were presented separately in time, such that the voices had their note onset either in the order of Bottom-  
86 Middle-Top or its reverse, while keeping the order balanced across trials. Prior to the actual MEG recording, participants  
87 received 10 to 15 min of training to familiarize themselves with the task: Participants were deemed ready to commence with  
88 the actual experiment once they managed to report the correct answers for at least five consecutive trials. As the task was  
89 designed to require continuous selective attention to the cued melody stream, it is imperative to maintain alertness and alleviate  
90 fatigue. We therefore introduced a brief break in the task every ~5 min, during which their general attentiveness was also  
91 assessed using the Karolinska sleepiness scale<sup>31</sup>. To minimize movement artefacts, participants were asked not to move when  
92 listening to each melody segment, which was at most 30 s. The MEG recording time was approximately 20 min per participant,  
93 including breaks.

### 94 2.3 Stimuli

95 Each of the three voices was constructed using a stream of 750 ms long sinusoidal tones of  $f_c$  between 131 – 329 Hz (Bottom  
96 voice: 131 - 220 Hz; Middle voice 147 – 294 Hz; Top voice 196 – 329 Hz), generated using the Ableton Live 9 software (Berlin,  
97 Germany). At the onset and offset of each tone, we introduced a 25 ms amplitude fade-in and fade-out to avoid audible  
98 compression clicks. These tones were then amplitude-modulated sinusoidally in Ableton Live 9 using  $f_m$  at 39 (Bottom voice),  
99 41 (Middle voice), and 43 (Top voice) Hz, and a modulation depth of 100% to achieve maximum ASSR power<sup>8</sup>. For simplicity,  
100 only tones in the C major harmonic scale were used. The duration of melody presentation was randomized to be between 9 –  
101 30 seconds long to reduce predictability of the stop point for maintaining the participants’ attention throughout the melody.  
102 Loudness was calibrated using a soundmeter (Type 2235, Brüel & Kjær, Nærum, Denmark) to account for differences in

103 subjective loudness for different frequency ranges<sup>32</sup>. The respective settings for the Bottom, Middle and Top voices were 0 dB,  
104 -6 dB and -10 dB. The stimulus was presented identically via ear tubes to both ears with the volume adjusted to be 75 dB SPL  
105 per ear, subjected to individual comfort level.

#### 106 2.4 Data Acquisition

107 MEG measurements were carried out using a 306-channel whole-scalp neuromagnetometer system (Elekta TRIUX™,  
108 Elekta Neuromag Oy, Helsinki, Finland). Data was recorded at a 1 kHz sampling rate, on-line bandpass filtered between 0.1-  
109 330 Hz and stored for off-line analysis. Horizontal eye-movements and eye-blinks were monitored using horizontal and vertical  
110 bipolar electroculography electrodes. Cardiac activity was monitored with bipolar electrocardiography electrodes attached  
111 below the left and right clavicle. Internal active shielding was active during MEG recordings to suppress electromagnetic  
112 artefacts from the surrounding environment. In preparation for the MEG-measurement, each participant's head shape was  
113 digitized using a Polhemus FASTRAK. The participant's head position and head movement were monitored during MEG  
114 recordings using head-position indicator coils. Anatomical MRIs were acquired using hi-res Sagittal T1 weighted 3D IR-SPGR  
115 (inversion recovery spoiled gradient echo) images by a GE MR750 3 Tesla scanner with the following pulse sequence  
116 parameters: 1 mm isotropic resolution, FoV 240x240 mm, acquisition matrix: 240 x 240, 180 slices 1 mm thick, bandwidth per  
117 pixel=347 Hz/pixel, Flip Angle=12 degrees, TI=400 ms, TE=2.4 ms, TR=5.5 ms resulting in a TR per slice of 1390 ms.

#### 118 2.5 Data Processing

119 The acquired MEG data was pre-processed using MaxFilter (-v2.2)<sup>33-34</sup>, and subsequently analysed and processed using the  
120 Fieldtrip toolbox<sup>35</sup> in MATLAB (Version 2016a, Mathworks Inc., Natick, MA), as well as the MNE-Python software<sup>36</sup>. Cortical  
121 reconstruction and volumetric segmentation of all participants' MRI was performed with the Freesurfer image analysis suite<sup>37</sup>.

##### 122 2.5.1 Pre-Processing

123 MEG data was MaxFiltered by applying temporal signal space separation (tSSS) to suppress artefacts from outside the MEG  
124 helmet and to compensate for head movement during recordings<sup>33-34</sup>, before being transformed to a default head position. The  
125 tSSS had a buffer length of 10 s and a cut-off correlation coefficient of 0.98. The continuous MEG data was divided into 1 s-  
126 long epochs from stimulus onset (i.e. onset of each individual note). Epochs were then visually inspected for artefacts and  
127 outliers with high variance were rejected using *ft\_rejectvisual*<sup>35</sup>. After cleaning, the remaining 69 % of all epochs were kept for  
128 further analyses. The data was divided into six experimental conditions, consisting of epochs (~100 per condition) for each of  
129 the three voices (Bottom, Middle, Top) under instructions to attend the Bottom voice or Top voice, respectively, i.e.: i) Bottom  
130 voice – Attend Bottom (Bottom-Attend), ii) Bottom voice – Attend Top (Bottom-Unattend), iii) Top voice – Attend Top (Top-  
131 Attend), iv) Top voice – Attend Bottom (Top-Unattend), v) Middle voice – Attend Bottom, vi) Middle voice – Attend Top.

##### 132 2.5.2 Behavioural data analysis

133 To assess response accuracy in the MDT task, mean task performance scores (number of correct responses out of 28 total  
134 responses) were calculated across all conditions separately for each participant.

##### 135 2.5.3 Sensor-space analysis

136 We carried out sensor-space analysis on the cleaned MEG epochs to extract the effect of selective attention on the ASSR.  
137 ERFs were also extracted to check for the manipulation of attention by the task, since it has already been well-documented in  
138 literature that attention enhances the ERF<sup>4-7</sup>. For these analyses, firstly, a 30 – 50 Hz bandpass filter was applied to obtain the  
139 ASSR, and a 20 Hz low-pass filter was applied to obtain the ERF. Within each participant, the filtered epochs were then  
140 averaged per condition, resulting in the *timelocked ASSR* and *timelocked ERF*. The ERF data was demeaned using an interval,  
141 100 - 0 ms before stimulus onset, as the baseline. To acquire the ASSR power spectrum in the frequency domain, a fast Fourier  
142 transform (hanning-tapered, frequency resolution = 1 Hz) was applied to the *timelocked ASSR* data above. The ASSR power  
143 spectrum and *timelocked ERF* data were further averaged across all gradiometer sensors, after collapsing data from orthogonal  
144 planar gradiometers, to give the average gradiometer data per participant. Gradiometer sensors were selected for analysis as  
145 they are generally less noisy compared to magnetometers. The ASSR power at  $f_m$ , (defined as 39, 41, and 43 Hz for the Bottom,  
146 Middle and Top voices respectively) was extracted accordingly for each of the six conditions to give the mean ASSR power at  
147  $f_m$  per condition (e.g. For the Bottom-Attend and Bottom-Unattend conditions, the power at 39 Hz was used). To obtain the  
148 ERF sustained field amplitude per condition, the average amplitude across the *timelocked ERF* data was calculated using a 300  
149 – 800 ms post-stimulus onset time window<sup>6, 38</sup>.

##### 150 2.5.4 Source-space analysis

151 In order to model the effect of selective attention on the ASSR at the anatomical level, we used a distributed source model  
152 containing 20484 dipolar sources on the cortical surface of each participant. By using a minimum-norm estimate (MNE)  
153 approach<sup>36</sup>, we estimated the amplitude of these sources that generated the ASSR. The *timelocked ASSR* data was used for this  
154 analysis, to produce MNE solutions for each participant that were subsequently morphed to a common head template -  
155 fsaverage. As an initial step, we calculated the group-averaged morphed MNE solution before computing its power spectral  
156 density (PSD) using Welch's method (hanning windowed, frequency resolution = 1 Hz). We then used the middle voice

157 (excluded from source analyses addressing the attention effect on ASSR) PSD as a localizer to identify ASSR sources across  
158 the cortex. The entire cortical sheet was divided into 105 sub-regions per hemisphere according to the Brainnetome Atlas<sup>39</sup>, and  
159 the PSDs of all vertices within each sub-region were averaged to give a median *localizer power* per sub-region. After inspecting  
160 the distribution of the median *localizer power* for all sub-regions, we discarded 14 outlier sub-regions per hemisphere with  
161 lowest signal strength (see Supplementary Fig. 1). For each of the remaining 91 sub-regions (symmetrical across both  
162 hemispheres), PSDs of the constituent vertices were averaged to give a median PSD per Sub-region x Voice (Bottom and Top  
163 voices only) x Attend condition. Next, the power at  $f_m$  (i.e. the ASSR power) during Attend and Unattend conditions was  
164 extracted separately for the Bottom and Top voices. The Attend versus Unattend ASSR power difference (Attend – Unattend)  
165 for each voice was computed as a percentage of the power at the Unattend condition (*% AU change*), representing a measure of  
166 the ASSR power enhancement due to selective attention. To obtain a visual estimation of the ASSR attentional enhancement  
167 across the cortical space, we mapped the *% AU change* over all sub-regions as shown in Figure 5. For a more concise numerical  
168 representation of the attentional contrast across the brain, the 91 sub-regions were subsequently categorized into 20 regions of  
169 interests (ROIs) per hemisphere according to the Brainnetome Atlas<sup>39</sup> (Fig. 6). As before, the PSDs of all vertices within each  
170 ROI were median-averaged before extracting the power at  $f_m$  per Voice x Attend condition. The *% AU change* was computed  
171 and tabulated in Table 1, alongside the median *localizer power* per ROI.  
172



173 **3. Results**

174 **3.1 Behavioural results**

175 Results from the MDT task showed that most participants performed significantly above the chance level of 33% ( $M = 67$   
 176 %,  $SD = 21.7$  %;  $t(28) = 8.39$ ,  $p_{\text{one-tailed}} < 0.001$ ). MDT task performance was not significantly different between directing  
 177 attention to Bottom and Top voice ( $p_{\text{two-tailed}} = 0.92$ ).

178 **3.2 MEG results**

179 **3.2.1 Sensor space**

180 We used sensor space analysis of MEG data to evaluate our primary hypothesis: Selective attention to frequency-tagged  
 181 melody streams enhances the magnitude of the ASSR corresponding to the attended stream. To extract the effect of selective  
 182 attention on the ASSR for each participant, we computed the average ASSR power spectrum across gradiometer sensors for all  
 183 six conditions: Bottom-Attend, Bottom-Unattend, Top-Attend, Top-Unattend, Middle voice - Attend Bottom, Middle voice –  
 184 Attend Top. For each of these conditions, we also calculated the average ERF sustained field to validate that our task  
 185 successfully manipulated selective attention. Figure 2 shows the across subject grand average ASSR power spectra. The ASSR  
 186 peaks for each voice can be observed clearly at the respective modulation frequencies of 39 (Bottom), 41 (Middle) and 43 (Top)  
 187 Hz.

188 **3.2.1.1 Attention and ASSR power**

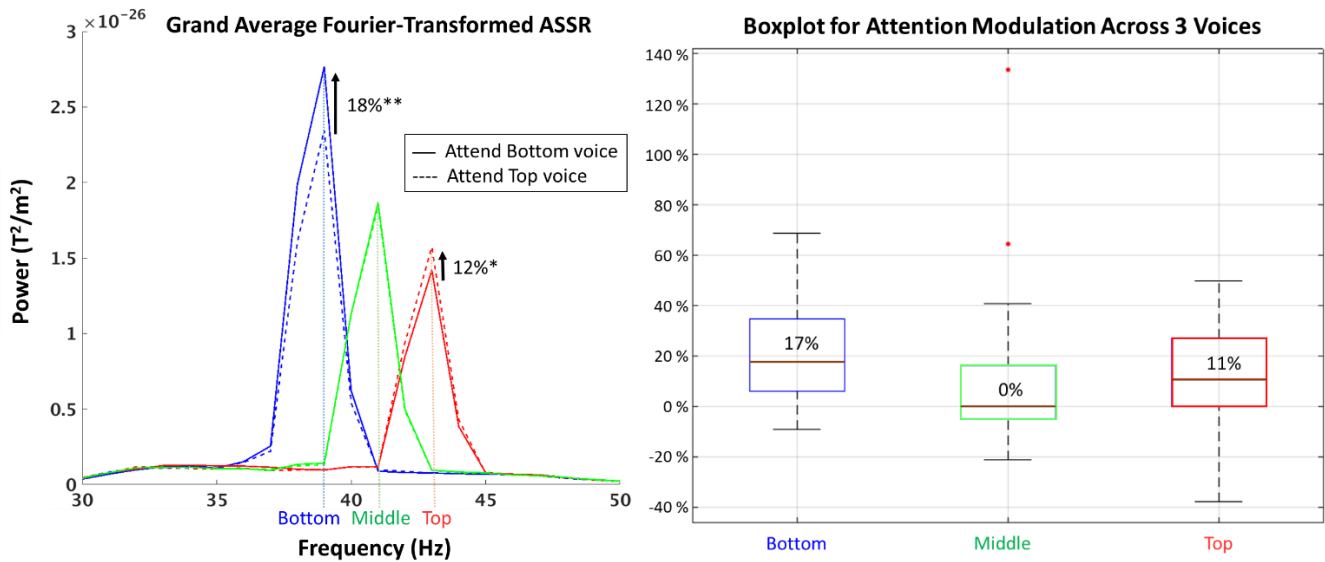

189 **Figure 2.** (Left panel) Across subject Grand Average ASSR power spectra for all conditions. ASSR power increased significantly when  
 190 participants attended the corresponding Bottom (39 Hz - blue) or Top (43 Hz - red) voice. For the reference Middle voice (41 Hz - green),  
 191 there was no significant difference between Attend Bottom and Attend Top. Arrows indicate mean percentage attentional enhancement  
 192 across all 28 participants.  $p < 0.01^{**}$ ,  $p < 0.05^*$

193 (Right panel) Boxplot showing the distribution of all 28 participant's percentage attentional change for the 3 voices. Median values are  
 194 marked with brown lines and displayed in each box, while the bottom and top edges of each box indicated the 25 % and 75 % percentiles  
 195 respectively. Outliers beyond the whiskers are plotted with red dots.  
 196

197 The Attend versus Unattend contrasts, using mean power (all units are in  $T^2/m^2$ ) at  $f_m$  for the Bottom and Top voices, yield  
 198 significant differences with a higher power for the Attend ( $M_{\text{bottom}} = 2.77 \cdot 10^{-26}$ ,  $SD_{\text{bottom}} = 3.2 \cdot 10^{-26}$ ;  $M_{\text{top}} = 1.57 \cdot 10^{-26}$ ,  $SD_{\text{top}} =$   
 199  $1.5 \cdot 10^{-26}$ ) compared to Unattend ( $M_{\text{bottom}} = 2.35 \cdot 10^{-26}$ ,  $SD_{\text{bottom}} = 2.6 \cdot 10^{-26}$ ;  $M_{\text{top}} = 1.43 \cdot 10^{-26}$ ,  $SD_{\text{top}} = 1.5 \cdot 10^{-26}$ )  
 200 condition ( $t(28)_{\text{bottom}} = 3.73$ ,  $p_{\text{two-tailed, bottom}} = 0.00086$ ;  $t(28)_{\text{top}} = 2.75$ ,  $p_{\text{two-tailed, top}} = 0.010$ ). These differences are expressed as a  
 201 percentage of increase relative to the Unattend condition, and indicated with arrows in Figure 2 (left panel), alongside the spread  
 202 of the data across individual participants (see Fig. 2, right panel). These results confirmed our primary hypothesis that selective  
 203 attention enhances ASSR power, and at an average of 14 % across both Bottom and Top voices. We also observed stronger  
 204 ASSR enhancement for the Bottom voice (17 %) compared to the Top voice (12 %). As expected, the ASSR enhancement was  
 205 specific for the selectively attended voice, and was not observed on the Middle voice which participants were never instructed  
 206 to attend to. Accordingly, there was no significant difference ( $t(28) = 0.54$ ,  $p_{\text{two-tailed}} = 0.59$ ) between Attend Bottom ( $M =$   
 207  $1.87 \cdot 10^{-26}$ ,  $SD = 1.9 \cdot 10^{-26}$ ) and Attend Top ( $M = 1.84 \cdot 10^{-26}$ ,  $SD = 2.0 \cdot 10^{-26}$ ) for the Middle voice.  
 208

209 **3.2.1.2 Attention and ERFs**

210 To validate that the MDT task manipulated attention successfully, we calculated the average ERF sustained field amplitude  
 211 per Voice  $\times$  Attend condition. The results from contrasting the Attend versus Unattend ERF showed significant differences for

212 the Bottom ( $t(28) = 5.59$ ,  $p_{\text{two-tailed}} < 0.001$ ) and Top ( $t(28) = 5.99$ ,  $p_{\text{two-tailed}} < 0.001$ ) voices. As with the ASSR, for the non-  
213 attended Middle voice, there was no significant difference between Attend Bottom and Attend Top ( $t(28) = 1.42$ ,  $p_{\text{two-tailed}} =$   
214  $0.16$ ). These results show that the MDT task was successful in reliably directing attention exclusively to the selected voice. The  
215 subject grand averaged ERFs per condition are illustrated in Figure 3 with arrows indicating the attentional enhancement [33  
216 % (Bot); 25 % (Top)].

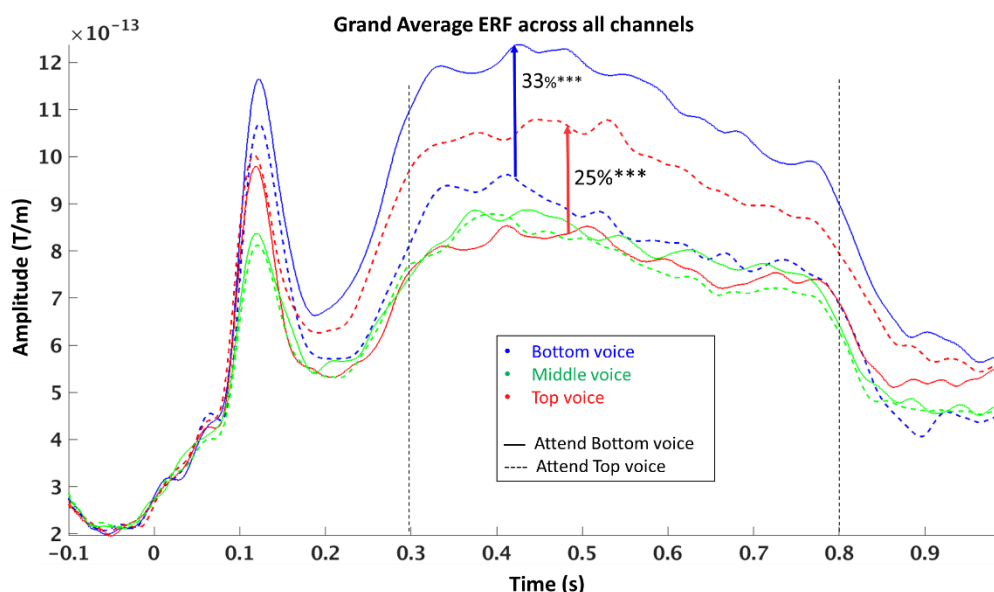

217  
218 **Figure 3.** Across subject Grand Average ERF for all conditions. The amplitude of the ERF sustained field was averaged across 300-800ms  
219 post-stimulus (black vertical dashed lines) and used for comparison between Attend versus Unattend conditions. As with the ASSR results,  
220 when participants attended the Bottom (blue) or Top (red) voice, corresponding ERF amplitudes increased significantly. There was no  
221 significant difference between Middle voice – Attend Bottom and Middle voice - Attend Top (green). Arrows indicate mean percentage  
222 attentional enhancement across all 28 participants.  $p < 0.001$ \*\*\*

### 223 3.2.2 Source space

224 Our secondary aim to determine the cortical distribution of neural sources that are involved in ASSR expression (section  
225 3.2.2.1 below) and their sensitivity to attentional modulation (section 3.2.2.2 below) was addressed with source space MEG  
226 analysis.

#### 227 3.2.2.1 Location of ASSR Sources

228 To identify the cortical areas involved in ASSR expression, a distributed MNE source estimate of the Middle voice localizer  
229 power was computed, revealing multiple ASSR sources that originate mainly from the temporal, parietal and frontal cortices.  
230 These source positions are coherent with the results of previous studies supporting ASSR activation sites extending beyond the  
231 auditory cortex<sup>40-42</sup>. Unsurprisingly, sources with the strongest power were found in the primary auditory cortical regions,  
232 followed by parietal and frontal sources. In addition, we observed an overall right-hemispheric bias of the ASSR, with a median-  
233 average of 33 % stronger ASSR power in the Right compared to Left hemisphere.



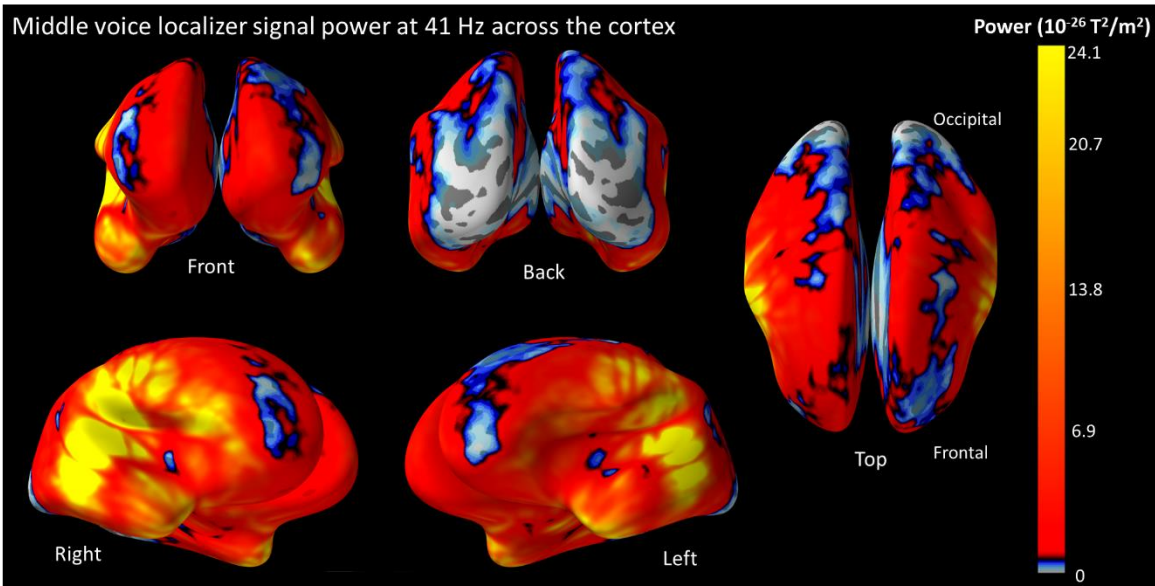

234  
235  
236  
237  
238  
239

**Figure 4.** ASSR power at 41 Hz for the Middle voice localizer across the cortex. The MNE solution for the Middle voice was used to estimate the location and strength of ASSR sources. Multiple ASSR sources were found over the entire cortical sheet with the strongest located in the primary auditory cortex. Other relatively strong sources were distributed over the temporal as well as parietal cortices, while sources with moderate activity were observed in the frontal region. Overall, the ASSR was stronger in the right than left hemisphere. The strength of the ASSR is described by the colour bar on the rightmost end.

240  
241  
242  
243  
244  
245  
246  
247

### 3.2.2.2 Location of ASSR Attentional Enhancement

To evaluate how much each area involved in ASSR expression is modulated by selective attention, we computed the *% AU change* - a measure of the relative ASSR attentional enhancement - across 91 sub-regions per cortical hemisphere for the Bottom and Top voices. Figure 5 shows the voice-averaged *% AU change* across these sub-regions. The frontal cortex shows a wider range of attentional modulation effects, with some focal parts exhibiting very strong attentional ASSR enhancement above 80 % (yellow) while other areas display moderately strong attentional effect around 40 % (orange). In contrast, temporal and parietal regions display weaker but more homogeneous distribution of attentional modulation across sub-regions, with ASSR enhancements typically around 20 - 25 % (dark orange).

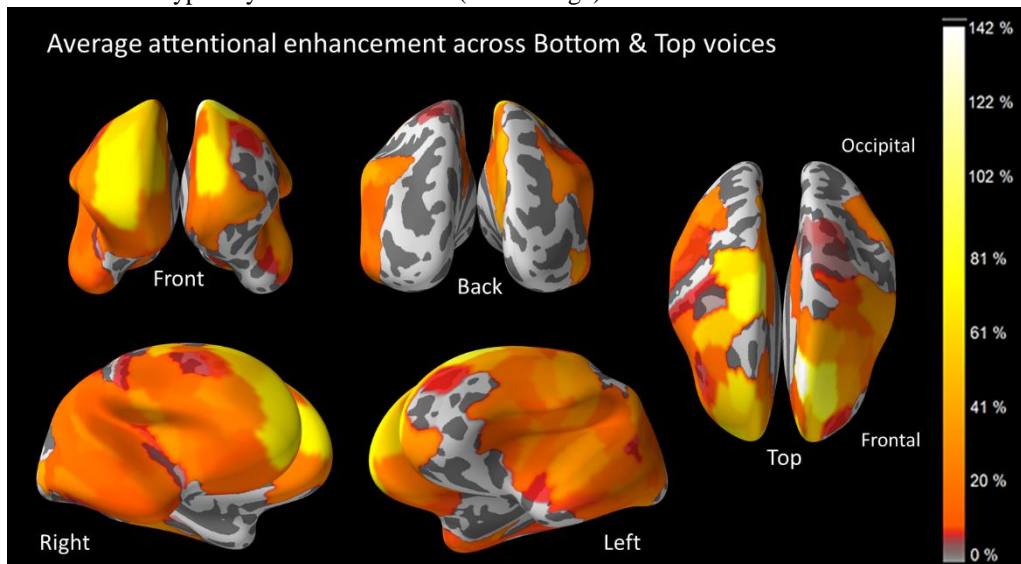

248  
249  
250  
251  
252  
253  
254  
255

**Figure 5.** Distribution of ASSR attentional enhancement over 182 sub-regions across the cortex. The average percentage increase in ASSR power between Attend and Unattend conditions across the Bottom and Top voices was computed and scaled according to the colour bar on the right. Generally speaking, frontal regions display a 2 – 4 times larger attentional enhancement than temporal and parietal regions. The frontal cortex also shows a wider range of attentional modulation effects across sub-regions, with some focal parts exhibiting above 80 % attentional ASSR enhancement (yellow) while other areas display comparatively weaker attentional effect of around 40 % (orange). On the other hand, temporal and parietal regions show more homogeneity in the distribution of attentional enhancement that revolves around 20 - 25 % (dark orange).

256  
257  
258

Subsequently, we categorized the sub-regions into 20 ROIs per hemisphere and compiled the *% AU change* for each in Table 1, sorted in order of decreasing median localizer power across both hemispheres (last column). The attention effect was distributed across all ROIs at an average of ~ 15 %. ROIs in the frontal gyrus appear to be most strongly and consistently

259 enhanced by attention, with the left superior frontal gyrus (Label #1 in Tab. 1 and Fig. 6) showing up to 54 % attentional  
 260 enhancement. Regions in the temporal and parietal lobes displayed up to 27 % and 35 % attentional enhancement respectively.  
 261 It is useful to note that while some ROIs in the bottom rows of Table 1 have high % AU change (e.g. Lateral Occipital Cortex)  
 262 that may suggest strong attentional enhancement, localizer ASSR power in these areas were extremely weak (within the lowest  
 263 5 % of all sub-regions for the Lateral Occipital Cortex). This calls for caution when interpreting whether the attentional  
 264 enhancement in these regions stems from the presence of true ASSR sources, or is likely a spurious result from noise or field  
 265 spread.

| Lobe      | Label # | Regions of interest                | % AU Change |     |     | Localizer Power (A <sup>2</sup> m <sup>2</sup> ) |          |          |
|-----------|---------|------------------------------------|-------------|-----|-----|--------------------------------------------------|----------|----------|
|           |         |                                    | LH          | RH  | BH  | LH                                               | RH       | BH       |
| Temporal  | 7       | Superior temporal gyrus            | 19%         | 15% | 17% | 1.24E-25                                         | 2.25E-25 | 1.74E-25 |
| Temporal  | 8       | Middle temporal gyrus              | 18%         | 11% | 15% | 1.14E-25                                         | 1.43E-25 | 1.29E-25 |
| Temporal  | 12      | Posterior superior temporal sulcus | 13%         | 14% | 14% | 1.06E-25                                         | 1.48E-25 | 1.27E-25 |
| Frontal   | 3       | Inferior frontal gyrus             | 15%         | 18% | 16% | 6.42E-26                                         | 1.03E-25 | 8.36E-26 |
| Temporal  | 9       | Inferior temporal gyrus            | 13%         | 14% | 14% | 5.87E-26                                         | 4.79E-26 | 5.33E-26 |
| Parietal  | 16      | Postcentral gyrus                  | 17%         | 11% | 14% | 3.84E-26                                         | 5.74E-26 | 4.79E-26 |
| Parietal  | 17      | Insular gyrus                      | 14%         | 15% | 15% | 2.23E-26                                         | 5.32E-26 | 3.77E-26 |
| Frontal   | 5       | Precentral gyrus                   | 15%         | 25% | 20% | 2.79E-26                                         | 4.21E-26 | 3.50E-26 |
| Temporal  | 10      | Fusiform gyrus                     | 27%         | 9%  | 18% | 2.72E-26                                         | 3.46E-26 | 3.09E-26 |
| Temporal  | 11      | Parahippocampal gyrus              | -14%        | 10% | -2% | 2.74E-26                                         | 3.17E-26 | 2.96E-26 |
| Frontal   | 4       | Orbital gyrus                      | -8%         | 15% | 3%  | 2.53E-26                                         | 3.21E-26 | 2.87E-26 |
| Parietal  | 14      | Inferior parietal lobule           | 14%         | 16% | 15% | 1.26E-26                                         | 2.67E-26 | 1.96E-26 |
| Frontal   | 6       | Paracentral lobule                 | -5%         | 59% | 27% | 1.52E-26                                         | 1.28E-26 | 1.40E-26 |
| Frontal   | 2       | Middle frontal gyrus               | 18%         | 25% | 21% | 8.79E-27                                         | 1.41E-26 | 1.15E-26 |
| Parietal  | 15      | Precuneus                          | -3%         | 35% | 16% | 1.12E-26                                         | 9.25E-27 | 1.02E-26 |
| Frontal   | 1       | Superior frontal gyrus             | 54%         | 32% | 43% | 6.67E-27                                         | 1.13E-26 | 8.96E-27 |
| Occipital | 20      | Lateral occipital cortex           | 20%         | 36% | 28% | 8.01E-27                                         | 8.35E-27 | 8.18E-27 |
| Parietal  | 13      | Superior parietal lobule           | -6%         | 0%  | -3% | 6.74E-27                                         | 9.49E-27 | 8.12E-27 |
| Occipital | 19      | MedioVentral occipital cortex      | 6%          | 19% | 13% | 7.86E-27                                         | 7.74E-27 | 7.80E-27 |
| Parietal  | 18      | Cingulate gyrus                    | 12%         | 14% | 13% | 5.12E-27                                         | 7.28E-27 | 6.20E-27 |

266 **Table 1.** % AU change for 20 ROIs, sorted in order of decreasing bi-hemispheric localizer power (rightmost column). The localizer power and  
 267 % AU change are shown for the Left Hemisphere (LH), Right Hemisphere (RH) and Both Hemisphere average (BH). The first column names  
 268 the lobe in which the ROI belongs, while the Label # column indicates its position numbered in Figure 6 below. Coloured rows highlight ROIs  
 269 belonging to the temporal (blue), frontal (orange), parietal (pink) and occipital (white) lobes.

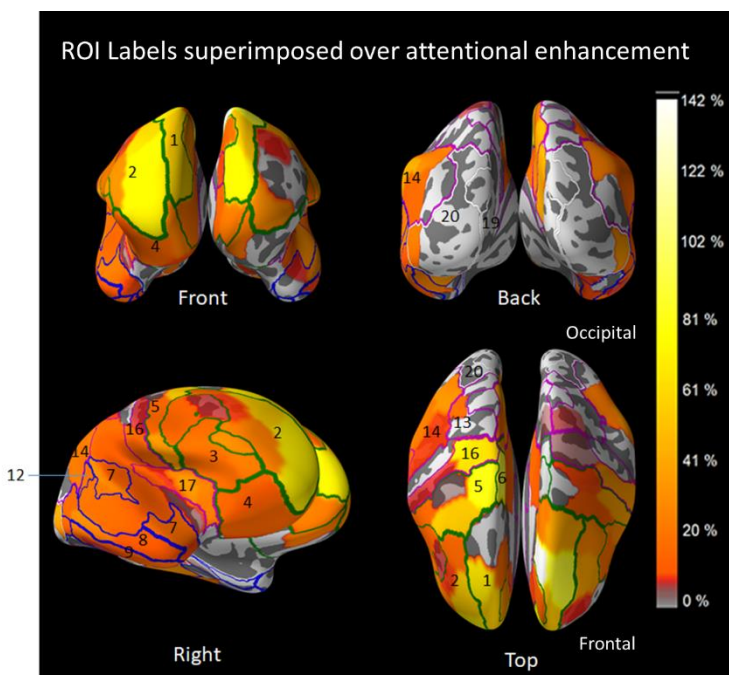

270  
 271 **Figure 6.** ROI labels shown over % AU change across the cortex (same as Fig. 5). ROIs in the frontal (green), temporal (blue), parietal  
 272 (magenta) and occipital (white) lobes are numbered according to the Label # column in Table 1. The left hemisphere is not shown for

273 simplicity but follows symmetrical labelling to the right hemisphere shown above. Labels 10, 11, 15 and 18 are located in the medial region  
274 between both hemispheres and thus not visible in this figure.

### 275 3.2.2.3 Lateralization of the ASSR attentional modulation

276 In line with previous studies<sup>25, 43-45</sup>, we observed stronger ASSR power in the right hemisphere as compared to the left  
277 hemisphere in each of the four lobes. Overall, the % AU change was also stronger in the right than left hemisphere by an  
278 average of 4 – 5 %. We examined the relationship between median ASSR localizer power and % AU change per sub-region  
279 and found no correlation between them (R = 0.002). Hence, the larger attentional enhancement in the RH cannot be explained  
280 by its stronger ASSR signal, but other neural processing factors might be at play.  
281

| Lobe      | Localizer Power (A <sup>2</sup> m <sup>2</sup> ) |          | % AU Change |     |
|-----------|--------------------------------------------------|----------|-------------|-----|
|           | LH                                               | RH       | LH          | RH  |
| Temporal  | 1.71E-26                                         | 2.19E-26 | 18%         | 19% |
| Frontal   | 5.74E-26                                         | 6.51E-26 | 12%         | 13% |
| Parietal  | 1.11E-26                                         | 1.09E-26 | 10%         | 14% |
| Occipital | 8.01E-27                                         | 8.35E-27 | 9%          | 20% |
| Median    | 1.41E-26                                         | 1.64E-26 | 11%         | 16% |
| Mean      | 2.34E-26                                         | 2.66E-26 | 12%         | 16% |

282 **Table 2.** Lateralization of ASSR localizer power and % AU change. Both power and  
283 % AU change are larger in the right hemisphere (RH) than the left hemisphere (LH).

## 284 4. Discussion

285 This study was conducted with the primary aim of examining whether selective attention to frequency-tagged melody  
286 streams (in this study coined *voices*) that are presented diotically enhances the magnitude of the ASSR specifically to the  
287 selectively attended voice. Consistent with our primary hypothesis, we observed significant enhancement of ASSR power due  
288 to selective attention in MEG sensor space. As a secondary aim, we also examined the cortical distribution of neural sources  
289 that are involved in ASSR expression and their sensitivity to attentional modulation. To this aim, we analysed the MEG data  
290 using an MNE distributed source model, and found differences in the degree of attentional enhancement across frontal, temporal  
291 and parietal ROIs, as well as between the hemispheres. While some previous studies have reported ASSR modulation when  
292 shifting selective attention between sensory modalities<sup>12-14</sup> and between ears (as in dichotic listening experiments)<sup>6, 15-17</sup>, our  
293 study investigates this effect on diotically presented sound streams that can only be distinguished by their perceptual content  
294 (i.e. pitch and timing). This is important as content-based separation is an important part of selective auditory attention in central  
295 to functions such as speech recognition and music listening. The following section discusses the key findings and relevance of  
296 the current study.

### 297 4.1 Attentional enhancement of ASSR:

298 Overall, our results showed that selective attention enhanced the 40 Hz ASSR power by an average of 15 %. We also  
299 demonstrated that this enhancement was specific to the attended Bottom and Top voices, but did not spread to the adjacent non-  
300 attended Middle voice. To the best of our knowledge, this is the first time any study has reported clear findings of ASSR  
301 attentional enhancement based solely on perceptual separation of stimuli sound content. While our results revealed stronger  
302 attentional modulation for the Bottom voice ASSR than the Top voice ASSR, we also noted that the mean Bottom voice ASSR  
303 power was higher than that of the Top voice, regardless of attentional condition. We believe that the main reason behind a  
304 lower Top voice ASSR power is that its volume was reduced to -10 dB relative to the Bottom Voice (as described under  
305 Methods). The loudness of the voices was adjusted to be subjectively equal for the MDT task, in order to compensate for the  
306 subjective amplification of higher pitch sounds in human hearing<sup>32</sup>, and this have created general ASSR power differences  
307 between the voices<sup>8</sup>. This volume difference as well as other differences between the voices, such as that in carrier frequency  
308 and modulation frequency, might also have contributed to the observed attentional differences across the Bottom and Top  
309 voices, although further studies are required to better investigate this. The modulation in ASSR power due to selective attention  
310 supports the notion of a top-down regulated gain control mechanism of attention, proposed by many authors in the past<sup>7, 20-23</sup>.  
311 Importantly, the results provide the first clear evidence that selective attention enhances the neuronal representation of an  
312 attended sound stream, even when the attended stream is not spatially separated from other sounds, as in dichotic listening  
313 designs.

#### 314 4.2 Location of ASSR Attentional Enhancement:

315 Regarding the cortical distribution of ASSR sources and their sensitivity to attentional modulation, MNE results revealed  
316 sources originating from a variety of frontal, temporal and parietal regions. Previous EEG<sup>42</sup> and positron emission tomography  
317 (PET)<sup>40-41</sup> studies have also found multiple sources generating the 40 Hz ASSR, including many regions outside the auditory  
318 pathway. These regions, especially the frontal areas, are commonly overlooked in ASSR-attention studies, which typically  
319 place exclusive focus on stronger sources within the primary auditory cortex. However, when interpreting our results on the  
320 location of ASSR attentional modulation, we recommend readers to consider the overall distribution of ASSR source activity  
321 (Fig. 4) when evaluating whether an area directly expresses an ASSR and an associated attentional modulation, or whether the  
322 observed enhancement is an indirect artefact of field spread from nearby strong sources. For example, no obvious independent  
323 ASSR sources were found in the Middle Temporal Gyrus and Inferior Temporal Gyrus in (see Fig. 4), leading us to believe  
324 that the observed ASSR and attentional enhancement at these areas are likely due to field spread from adjacent regions.  
325 Conversely, judging from Figure 4, the Superior Temporal Gyrus (Label #7) and Postcentral Gyrus (Label #16) both contain  
326 strongly activated and visibly independent ASSR sources, thus providing more convincing evidence that substantiates the  
327 presence of actual ASSR enhancement.

328 A striking finding in our source level results is that there are large differences in the degree of attentional modulation across  
329 anatomical regions, with high levels of modulation outside the auditory system. Indeed, we found that the ASSR localized to  
330 the frontal gyrus displayed the largest degree of attentional modulation. As seen in Figure 5, most cortical areas display a ~ 25  
331 % attentional enhancement from selective attention, whereas regions in the prefrontal cortex showed up to 60 - 80 %  
332 enhancement, with the effect concentrated locally in the superior frontal gyrus. This is not surprising per se as the prefrontal  
333 cortex has been long regarded as the centre of attentional control in neuroscience literature involving auditory attention<sup>29-30, 50-  
334 51</sup> as well as attention in other sensory modalities<sup>27-28</sup>. In addition to the frontal cortices, we also found relatively more  
335 homogeneous attentional enhancement in the temporal and parietal sub-regions of ~ 25 %. Similar to our findings, attentional  
336 enhancement of the ASSR in the auditory cortex has been reported by several studies, although limited to spatial<sup>6, 15-17</sup> and  
337 intermodal<sup>12-14</sup> attention. Evidence of auditory attentional modulation in the parietal cortex has also been reported in previous  
338 studies<sup>29, 52-55</sup>, although not within the ASSR domain, owing perhaps to the lack of documentation on ASSR sources outside  
339 the auditory cortex. Interestingly, the motor cortex, housed by the parts of the frontal and parietal lobes, is known to exhibit a  
340 robust entrainment to sensory stimulation rhythms that is also enhanced from attention<sup>53, 56-58</sup>. Since the ASSR may be  
341 conceptualized as an entrainment (to the stimulus) itself, it is reasonable that ASSR activity and its attentional modulation was  
342 found in the motor cortex.

343 Our results demonstrated a systematic right-hemispheric bias, both in terms of general ASSR power as well as attentional  
344 modulation. Although a right-hemispheric bias of the ASSR to tones is not new in literature<sup>25, 43-45</sup>, the topic of ASSR attentional  
345 lateralization is currently much less explored. While there exists some evidence of ASSR attentional lateralization<sup>12-13, 15</sup>, the  
346 conclusion varies across different tasks, brain regions and stimuli. The most straightforward explanation to the systematic right-  
347 hemispheric bias observed in our results is the greater involvement of the right compared to the left hemisphere in spectral  
348 processing, especially when using tones and musical stimuli<sup>43, 59-60</sup>. Since we specifically assessed how attention modulates the  
349 spectral content of the associated neural response (in that it increases the power at specific AM frequencies), it is conceivable  
350 that the right-hemisphere spectral specialization causes both the ASSR and its modulation to be encoded with greater fidelity  
351 in the right than left hemisphere.

#### 352 4.3 Overcoming challenges in ASSR attentional modulation research

353 Since the current literature is inconsistent about whether and how intramodal auditory selective attention modulates the  
354 ASSR, a consensus on this topic has yet not been reached. This is likely attributed to factors related to stimuli, task and analytical  
355 differences. For instance, *first*, using competing stimuli with too similar properties can lead to weak perceptual separation and  
356 subsequently less effective selective attention. In many cases, the competing stimuli have similar or even identical carrier  
357 frequencies<sup>15-16, 46</sup>, and simultaneous onsets<sup>47</sup>, making it difficult for participants to differentiate between stimuli, thereby  
358 translating into a smaller ASSR power difference between Attend and Unattend conditions which the measurement instrument  
359 and analysis approach may not be sensitive enough to pick up. *Second*, several studies adopted a target detection task, placing  
360 salient targets, such as a change in frequency or intensity, in both the attended stream and distractor streams<sup>16-17, 47</sup>. This can  
361 result in a bottom-up effect from the distractor during the appearance of targets, thereby reducing the degree of selective  
362 attention to the attended stream. Moreover, there is evidence demonstrating that salient events amplify the ASSR in the  
363 unattended stream<sup>48</sup>, which can also reduce the Attend vs Unattend ASSR contrast. A *third* reason could be the narrow focus  
364 on temporal auditory core regions in source models used to localize the ASSR by most studies<sup>15-16, 47</sup>. Although the ASSR is  
365 strongest at these areas, a one-sided focus on these regions risks overlooking other areas such as the frontal and parietal cortices  
366 that can exhibit greater selective attention effects, as is indeed seen in our current study. In this study, we sought to alleviate  
367 these potential pitfalls by improving stream separability with the use of tones that are easily separable by timing as well as  
368 pitch, inspecting the corresponding ERFs to check for successful manipulation of selective attention, adopting a melody  
369 tracking task in place of target detection, and using a distributed source model to examine the entire cortical sheet for ASSR  
370 activity.



371 *4.4 Limitations of current study:*

372 While our present results make novel contributions to the existing literature on ASSR methodology as well as the  
373 neuroscientific understanding of selective auditory attention, the study has several limitations and calls for further work to  
374 clarify the present results. Primarily speaking, our results build on ASSR sources generated by AM frequencies close to 40 Hz  
375 and may not be generalizable across ASSRs at other frequencies as they tend to display different source distribution patterns<sup>42</sup>.  
376 Secondly, while the use of sine tones that are separated in time may not be an accurate representation of natural auditory  
377 mixtures such as a large choir or a symphony orchestra, the ASSR approach developed in this study is the first of its kind and  
378 serves as a stepping stone for future studies on selective attention in more natural and complex environments.

379 *4.5 Conclusions*

380 In this study, we demonstrated that selective attention strongly enhances the ASSR, and that this effect can be robustly  
381 observed at sensor level. At source level, the attention effect is widely observable across the cortex and strongest in the frontal  
382 regions, which is well-aligned with current literature marking the pre-frontal cortex as the centre for attentional control<sup>27-28, 30</sup>.  
383 This also highlights the importance of including non-auditory areas in ASSR application studies. Overall, the current study  
384 presents clear evidence that selective auditory attention to the sound content of musical streams increases the ASSR power of  
385 the attended stream according to a specific neural pattern. Since the ASSR can readily capture these attentional changes in a  
386 stimuli-precise manner, it can serve as a useful tool for future research on selective attention in complex auditory scenarios.

387 **Conflicts of Interests**

388 None

389 **Acknowledgments**

390 Data for this study was collected at NatMEG, the National Facility for Magnetoencephalography (<http://natmeg.se>),  
391 Karolinska Institutet, Sweden. The NatMEG facility is supported by Knut & Alice Wallenberg (KAW2011.0207). This study  
392 was supported by the Swedish Foundation for Strategic Research (SBE 13-0115).

393 **References**

- 394 1. Cherry, E. C., Some Experiments on the Recognition of Speech, with One and with Two Ears. *The Journal of the*  
395 *Acoustical Society of America* **1953**, 25 (5), 975-979.
- 396 2. Parbery-Clark, A.; Skoe, E.; Lam, C.; Kraus, N., Musician enhancement for speech-in-noise. *Ear and hearing* **2009**,  
397 30 (6), 653.
- 398 3. Parbery-Clark, A.; Skoe, E.; Kraus, N., Musical Experience Limits the Degradative Effects of Background Noise on  
399 the Neural Processing of Sound. *The Journal of Neuroscience* **2009**, 29 (45), 14100-14107.
- 400 4. Hansen, J. C.; Dickstein, P. W.; Berka, C.; Hillyard, S. A., Event-related potentials during selective attention to speech  
401 sounds. *Biological Psychology* **1983**, 16 (3-4), 211-224.
- 402 5. Woods, D. L.; Hillyard, S. A.; Hansen, J. C., Event-related brain potentials reveal similar attentional mechanisms  
403 during selective listening and shadowing. *Journal of Experimental Psychology: Human Perception and Performance* **1984**, 10  
404 (6), 761-777.
- 405 6. Bidet-Caulet, A.; Fischer, C.; Besle, J.; Aguera, P.-E.; Giard, M.-H.; Bertrand, O., Effects of Selective Attention on  
406 the Electrophysiological Representation of Concurrent Sounds in the Human Auditory Cortex. *The Journal of Neuroscience*  
407 **2007**, 27 (35), 9252-9261.
- 408 7. Woldorff, M. G.; Gallen, C. C.; Hampson, S. A.; Hillyard, S. A.; Pantev, C.; Sobel, D.; Bloom, F. E., Modulation of  
409 early sensory processing in human auditory cortex during auditory selective attention. *Proceedings of the National Academy of*  
410 *Sciences of the United States of America* **1993**, 90 (18), 8722-8726.
- 411 8. Ross, B.; Borgmann, C.; Draganova, R.; Roberts, L. E.; Pantev, C., A high-precision magnetoencephalographic study  
412 of human auditory steady-state responses to amplitude-modulated tones. *J Acoust Soc Am* **2000**, 108 (2), 679-91.
- 413 9. Regan, D., Human brain electrophysiology : evoked potentials and evoked magnetic fields in science and medicine.  
414 Elsevier: New York, 1989.
- 415 10. Picton, T. W.; John, M. S.; Dimitrijevic, A.; Purcell, D., Human auditory steady-state responses. *Int J Audiol* **2003**,  
416 42 (4), 177-219.
- 417 11. Lins, O. G.; Picton, T. W., Auditory steady-state responses to multiple simultaneous stimuli. *Electroencephalogr Clin*  
418 *Neurophysiol* **1995**, 96 (5), 420-32.
- 419 12. Gander, P. E.; Bosnyak, D. J.; Roberts, L. E., Evidence for modality-specific but not frequency-specific modulation  
420 of human primary auditory cortex by attention. *Hearing Research* **2010**, 268 (1), 213-226.
- 421 13. Saupe, K.; Schröger, E.; Andersen, S. K.; Müller, M. M., Neural Mechanisms of Intermodal Sustained Selective  
422 Attention with Concurrently Presented Auditory and Visual Stimuli. *Frontiers in Human Neuroscience* **2009**, 3, 58.
- 423 14. Keitel, C.; Schröger, E.; Saupe, K.; Müller, M. M., Sustained selective intermodal attention modulates processing of  
424 language-like stimuli. *Experimental Brain Research* **2011**, 213 (2), 321-327.
- 425 15. Müller, N.; Schlee, W.; Hartmann, T.; Lorenz, I.; Weisz, N., Top-Down Modulation of the Auditory Steady-State  
426 Response in a Task-Switch Paradigm. *Frontiers in Human Neuroscience* **2009**, 3, 1.
- 427 16. Bharadwaj, H.; Lee, A. K. C.; Shinn-Cunningham, B., Measuring auditory selective attention using frequency tagging.  
428 *Frontiers in Integrative Neuroscience* **2014**, 8 (6).
- 429 17. Lazzouni, L.; Ross, B.; Voss, P.; Lepore, F., Neuromagnetic auditory steady-state responses to amplitude modulated  
430 sounds following dichotic or monaural presentation. *Clinical Neurophysiology* **2010**, 121 (2), 200-207.
- 431 18. Bharadwaj, H. M.; Lee, A. K. C.; Shinn-Cunningham, B. G., Measuring auditory selective attention using frequency  
432 tagging. *Frontiers in Integrative Neuroscience* **2014**, 8, 6.
- 433 19. Cohen, D., Magnetoencephalography: detection of the brain's electrical activity with a superconducting magnetometer.  
434 *Science* **1972**, 175 (4022), 664-6.
- 435 20. Hillyard, S. A.; Vogel, E. K.; Luck, S. J., Sensory gain control (amplification) as a mechanism of selective attention:  
436 electrophysiological and neuroimaging evidence. *Philosophical transactions of the Royal Society of London. Series B,*  
437 *Biological sciences* **1998**, 353 (1373), 1257-70.
- 438 21. Hillyard, S. A.; Hink, R. F.; Schwent, V. L.; Picton, T. W., Electrical Signs of Selective Attention in the Human Brain.  
439 *Science* **1973**, 182 (4108), 177-180.
- 440 22. Kerlin, J. R.; Shahin, A. J.; Miller, L. M., Attentional Gain Control of Ongoing Cortical Speech Representations in a  
441 "Cocktail Party". *The Journal of Neuroscience* **2010**, 30 (2), 620-628.
- 442 23. Lee, A. K. C.; Larson, E.; Maddox, R. K.; Shinn-Cunningham, B. G., Using neuroimaging to understand the cortical  
443 mechanisms of auditory selective attention. *Hearing Research* **2014**, 307, 111-120.
- 444 24. Schoonhoven, R.; Boden, C. J. R.; Verbunt, J. P. A.; de Munck, J. C., A whole head MEG study of the amplitude-  
445 modulation-following response: phase coherence, group delay and dipole source analysis. *Clinical Neurophysiology* **2003**, 114  
446 (11), 2096-2106.
- 447 25. Steinmann, I.; Gutschalk, A., Potential fMRI correlates of 40-Hz phase locking in primary auditory cortex, thalamus  
448 and midbrain. *NeuroImage* **2011**, 54 (1), 495-504.
- 449 26. Lamminmäki, S.; Parkkonen, L.; Hari, R., Human Neuromagnetic Steady-State Responses to Amplitude-Modulated  
450 Tones, Speech, and Music. *Ear and Hearing* **2014**, 35 (4), 461-467.
- 451 27. Cohen, R. A., Attention and the Frontal Cortex. In *The Neuropsychology of Attention*, Springer US: Boston, MA,  
452 2014; pp 335-379.
- 453 28. Foster, J. K.; Eskes, G. A.; Stuss, D. T., The cognitive neuropsychology of attention: A frontal lobe perspective.  
454 *Cognitive Neuropsychology* **1994**, 11 (2), 133-147.



- 455 29. Shomstein, S.; Yantis, S., Parietal Cortex Mediates Voluntary Control of Spatial and Nonspatial Auditory Attention. *The Journal of Neuroscience* **2006**, *26* (2), 435-439.
- 456
- 457 30. Plakke, B.; Romanski, L. M., Auditory connections and functions of prefrontal cortex. *Frontiers in neuroscience* **2014**,
- 458 8, 199-199.
- 459 31. Akerstedt, T.; Gillberg, M., Subjective and objective sleepiness in the active individual. *The International journal of*
- 460 *neuroscience* **1990**, *52* (1-2), 29-37.
- 461 32. Robinson, D. W.; Dadson, R. S., A re-determination of the equal-loudness relations for pure tones. *British Journal of*
- 462 *Applied Physics* **1956**, *7* (5), 166.
- 463 33. Taulu, S.; Kajola, M.; Simola, J., Suppression of Interference and Artefacts by the Signal Space Separation Method.
- 464 2004; Vol. 16, p 269-75.
- 465 34. Taulu, S.; Simola, J., Spatiotemporal signal space separation method for rejecting nearby interference in MEG
- 466 measurements. *Physics in medicine and biology* **2006**, *51* (7), 1759-68.
- 467 35. Oostenveld, R.; Fries, P.; Maris, E.; Schoffelen, J.-M., FieldTrip: Open Source Software for Advanced Analysis of
- 468 MEG, EEG, and Invasive Electrophysiological Data. *Computational Intelligence and Neuroscience* **2011**, *2011*, 9.
- 469 36. Gramfort, A.; Luessi, M.; Larson, E.; Engemann, D.; Strohmeier, D.; Brodbeck, C.; Goj, R.; Jas, M.; Brooks, T.;
- 470 Parkkonen, L.; Hämäläinen, M., MEG and EEG data analysis with MNE-Python. *Frontiers in Neuroscience* **2013**, *7* (267).
- 471 37. Fischl, B., FreeSurfer. *Neuroimage* **2012**, *62* (2), 774-81.
- 472 38. Picton, T. W.; Woods, D. L.; Proulx, G. B., Human auditory sustained potentials. I. The nature of the response. *Electroencephalography and clinical neurophysiology* **1978**, *45* (2), 186-197.
- 473
- 474 39. Fan, L.; Chu, C.; Li, H.; Chen, L.; Xie, S.; Zhang, Y.; Yang, Z.; Jiang, T.; Laird, A. R.; Wang, J.; Zhuo, J.; Yu, C.;
- 475 Fox, P. T.; Eickhoff, S. B., The Human Brainnetome Atlas: A New Brain Atlas Based on Connectional Architecture. *Cerebral*
- 476 *Cortex* **2016**, *26* (8), 3508-3526.
- 477 40. Reyes, S. A.; Lockwood, A. H.; Salvi, R. J.; Coad, M. L.; Wack, D. S.; Burkard, R. F., Mapping the 40-Hz auditory
- 478 steady-state response using current density reconstructions. *Hearing Research* **2005**, *204* (1), 1-15.
- 479 41. Reyes, S. A.; Salvi, R. J.; Burkard, R. F.; Coad, M. L.; Wack, D. S.; Galantowicz, P. J.; Lockwood, A. H., PET imaging
- 480 of the 40 Hz auditory steady state response. *Hearing Research* **2004**, *194* (1), 73-80.
- 481 42. Farahani, E. D.; Goossens, T.; Wouters, J.; van Wieringen, A., Spatiotemporal reconstruction of auditory steady-state
- 482 responses to acoustic amplitude modulations: Potential sources beyond the auditory pathway. *NeuroImage* **2017**, *148*, 240-253.
- 483 43. Ross, B.; Herdman, A. T.; Pantev, C., Right Hemispheric Laterality of Human 40 Hz Auditory Steady-state Responses. *Cerebral Cortex* **2005**, *15* (12), 2029-2039.
- 484
- 485 44. Schneider, P.; Scherg, M.; Dosch, H. G.; Specht, H. J.; Gutschalk, A.; Rupp, A., Morphology of Heschl's gyrus reflects
- 486 enhanced activation in the auditory cortex of musicians. *Nat Neurosci* **2002**, *5* (7), 688-694.
- 487 45. Weisz, N.; Lithari, C., Amplitude modulation rate dependent topographic organization of the auditory steady-state
- 488 response in human auditory cortex. *Hearing Research* **2017**, *354*, 102-108.
- 489 46. Mahajan, Y.; Davis, C.; Kim, J., Attentional Modulation of Auditory Steady-State Responses. *PLoS ONE* **2014**, *9*
- 490 (10), e110902.
- 491 47. Gander, P. E.; Bosnyak, D. J.; Roberts, L. E., Evidence for modality-specific but not frequency-specific modulation
- 492 of human primary auditory cortex by attention. *Hearing Research* **2010**, *268* (1), 213-226.
- 493 48. Shuai, L.; Elhilali, M., Task-dependent neural representations of salient events in dynamic auditory scenes. *Frontiers*
- 494 *in Neuroscience* **2014**, *8* (203).
- 495 49. Xiang, J.; Simon, J.; Elhilali, M., Competing Streams at the Cocktail Party: Exploring the Mechanisms of Attention
- 496 and Temporal Integration. *The Journal of Neuroscience* **2010**, *30* (36), 12084-12093.
- 497 50. Pugh, K. R.; Shaywitz, B. A.; Shaywitz, S. E.; Fulbright, R. K.; Byrd, D.; Skudlarski, P.; Shankweiler, D. P.; Katz,
- 498 L.; Constable, R. T.; Fletcher, J.; Lacadie, C.; Marchione, K.; Gore, J. C., Auditory Selective Attention: An fMRI Investigation. *NeuroImage* **1996**, *4* (3), 159-173.
- 499
- 500 51. Tzourio, N.; El Massioui, F.; Crivello, F.; Joliot, M.; Renault, B.; Mazoyer, B., Functional Anatomy of Human
- 501 Auditory Attention Studied with PET. *NeuroImage* **1997**, *5* (1), 63-77.
- 502 52. Wu, C. T.; Weissman, D. H.; Roberts, K. C.; Woldorff, M. G., The neural circuitry underlying the executive control
- 503 of auditory spatial attention. *Brain Res* 2007, *1134* (1), 187-98.
- 504 53. Besle, J.; Schevon, C. A.; Mehta, A. D.; Lakatos, P.; Goodman, R. R.; McKhann, G. M.; Emerson, R. G.; Schroeder,
- 505 C. E., Tuning of the Human Neocortex to the Temporal Dynamics of Attended Events. *The Journal of Neuroscience* 2011, *31*
- 506 (9), 3176-3185.
- 507 54. Alain, C.; Arnott, S. R.; Hevenor, S.; Graham, S.; Grady, C. L., "What" and "where" in the human auditory system.
- 508 *Proceedings of the National Academy of Sciences* 2001, *98* (21), 12301-12306.
- 509 55. Hill, K. T.; Miller, L. M., Auditory Attentional Control and Selection during Cocktail Party Listening. *Cerebral Cortex*
- 510 (New York, NY) 2010, *20* (3), 583-590.
- 511 56. Horton, C.; D'Zmura, M.; Srinivasan, R., Suppression of competing speech through entrainment of cortical
- 512 oscillations. *Journal of neurophysiology* 2013, *109* (12), 3082-3093.
- 513 57. Fujioka, T.; Ross, B.; Trainor, L. J., Beta-Band Oscillations Represent Auditory Beat and Its Metrical Hierarchy in
- 514 Perception and Imagery. *The Journal of Neuroscience* 2015, *35* (45), 15187-15198.
- 515 58. Sameiro-Barbosa, C. M.; Geiser, E., Sensory Entrainment Mechanisms in Auditory Perception: Neural
- 516 Synchronization Cortico-Striatal Activation. *Frontiers in Neuroscience* 2016, *10* (361).

- 517 59. Zatorre, R. J.; Belin, P.; Penhune, V. B., Structure and function of auditory cortex: music and speech. *Trends in*  
518 *Cognitive Sciences* 2002, 6 (1), 37-46.
- 519 60. Zatorre, R. J.; Belin, P., Spectral and Temporal Processing in Human Auditory Cortex. *Cerebral Cortex* 2001, 11 (10),  
520 946-953.

521 **Supplementary Information**

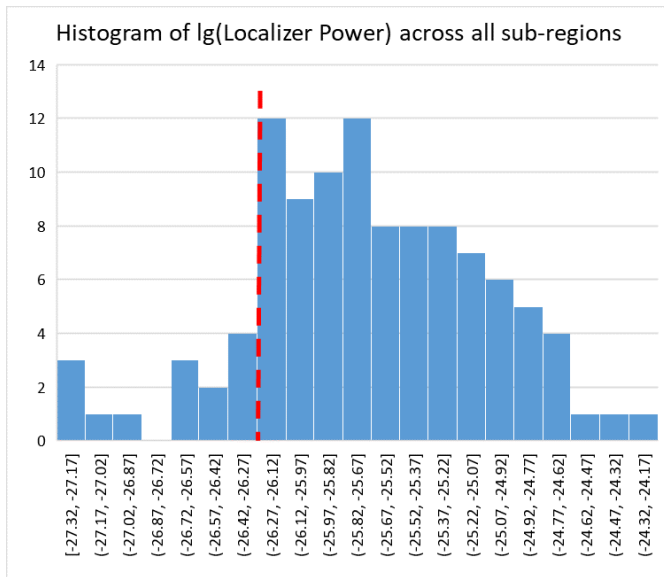

522 **Supplementary Figure 1.** Distribution of hemispheric-averaged lg(Localizer Power) across all 105 sub-regions. A threshold  
523 of -26.27 was selected (red dotted line) that gives rise to 14 lowest signal outlier sub-regions being discarded for each  
524 hemisphere.  
525
